# Supplementary material for: Pneumococcal galactose catabolism is controlled by multiple regulators acting on pyruvate formate lyase
Source: PubMed Central journal article supplement (PMC5327383; doi:10.1038/srep43587), 2017-02-27
Supplement: srep43587-s1.pdf [file srep43587-s1.pdf]

## **Supplementary Information**

### **Pneumococcal galactose catabolism is controlled by multiple regulators acting on pyruvate formate lyase**

Firas A.Y. Al-Bayati<sup>1,2</sup>, Hasan F. H. Kahya<sup>1,2</sup>, Andreas Damianou<sup>1</sup>, Sulman Shafeeq<sup>3</sup>, Oscar P. Kuipers<sup>3</sup>, Peter W. Andrew<sup>1</sup>, and Hasan Yesilkaya<sup>1\*</sup>

<sup>1</sup>Department of Infection, Immunity & Inflammation, University of Leicester, Leicester, LE1 9HN, UK,

<sup>2</sup>Department of Biology, College of Education, University of Mosul, Iraq

<sup>3</sup>Molecular Genetics, University of Groningen, Nijenborgh 7, 9747 AG, Groningen, the Netherlands.

**Supplementary Table S1. Fold change assessment of expression for selected genes in mutant pneumococcal strains grown anaerobically in CDM supplemented with 55 mM galactose relative to wild type strain D39 by quantitative real time reverse transcriptase PCR.**

| Genes       | $\Delta ccpA$  | $\Delta glnR$   |
|-------------|----------------|-----------------|
|             | <i>pflB</i>    | -6.2* $\pm$ 0.4 |
| <i>pflA</i> | 3.8 $\pm$ 0.1  | 2.4 $\pm$ 0.15  |
| <i>ccpA</i> | -5.9 $\pm$ 0.3 | -1.8 $\pm$ 0.1  |
| <i>glnR</i> | -4.7 $\pm$ 0.2 | 1.2 $\pm$ 0.08  |

\* ‘-‘ indicates down regulation of genes,  $\pm$  represents the standard deviation for three individual measurements.

**Supplementary Table S2.** List of strains or plasmids used and constructed in this study.

| Strains/Plasmids                             | Description/Use <sup>a</sup>                                                                      | Source           |
|----------------------------------------------|---------------------------------------------------------------------------------------------------|------------------|
| <i>S. pneumoniae</i>                         |                                                                                                   |                  |
| D39                                          | Serotype 2 strain                                                                                 | Laboratory stock |
| $\Delta pflB$                                | D39; SPD0420:Spec <sup>R</sup>                                                                    | 1                |
| $\Delta ccpA$                                | D39; SPD1797:Spec <sup>R</sup>                                                                    | This study       |
| $\Delta ccpAK$                               | D39; SPD1797:Kan <sup>R</sup>                                                                     | This study       |
| $\Delta plcR$                                | D39; SPD1745:Spec <sup>R</sup>                                                                    | This study       |
| $\Delta merR$                                | D39; SPD1637:Spec <sup>R</sup>                                                                    | This study       |
| $\Delta gntR$                                | D39; SPD1524:Spec <sup>R</sup>                                                                    | This study       |
| $\Delta glnR$                                | D39; SPD0447:Spec <sup>R</sup>                                                                    | This study       |
| $\Delta marR$                                | D39; SPD0379:Spec <sup>R</sup>                                                                    | This study       |
| $\Delta ccpA\Delta glnR$                     | D39; SPD1797:Kan <sup>R</sup> ; SPD0447:Spec <sup>R</sup>                                         | This study       |
| $\Delta ccpA$ Comp                           | D39; <i>ccpA</i> + $\Delta ccpA$ :Spec <sup>R</sup> ; Kan <sup>R</sup>                            | This study       |
| $\Delta plcR$ Comp                           | D39; <i>plcR</i> + $\Delta plcR$ :Spec <sup>R</sup> ; Kan <sup>R</sup>                            | This study       |
| $\Delta gntR$ Comp                           | D39; <i>gntR</i> + $\Delta gntR$ :Spec <sup>R</sup> ; Kan <sup>R</sup>                            | This study       |
| $\Delta glnR$ Comp                           | D39; <i>glnR</i> + $\Delta glnR$ :Spec <sup>R</sup> ; Kan <sup>R</sup>                            | This study       |
| pPP1:: <i>lacZ</i> -wt                       | D39; $\Delta bgaA$ ::pPP1- <i>lacZ</i> ; Tet <sup>R</sup>                                         | This study       |
| P <i>ccpA</i> :: <i>lacZ</i> -wt             | D39; $\Delta bgaA$ ::P <i>ccpA</i> - <i>lacZ</i> ; Tet <sup>R</sup>                               | This study       |
| P <i>plcR</i> :: <i>lacZ</i> -wt             | D39; $\Delta bgaA$ ::P <i>plcR</i> - <i>lacZ</i> ; Tet <sup>R</sup>                               | This study       |
| P <i>merR</i> :: <i>lacZ</i> -wt             | D39; $\Delta bgaA$ ::P <i>merR</i> - <i>lacZ</i> ; Tet <sup>R</sup>                               | This study       |
| P <i>gntR</i> :: <i>lacZ</i> -wt             | D39; $\Delta bgaA$ ::P <i>gntR</i> - <i>lacZ</i> ; Tet <sup>R</sup>                               | This study       |
| P <i>glnR</i> :: <i>lacZ</i> -wt             | D39; $\Delta bgaA$ ::P <i>glnR</i> - <i>lacZ</i> ; Tet <sup>R</sup>                               | This study       |
| P <i>marR</i> :: <i>lacZ</i> -wt             | D39; $\Delta bgaA$ ::P <i>marR</i> - <i>lacZ</i> ; Tet <sup>R</sup>                               | This study       |
| P <i>pflB</i> :: <i>lacZ</i> -wt             | D39; $\Delta bgaA$ ::P <i>pflB</i> - <i>lacZ</i> ; Tet <sup>R</sup>                               | This study       |
| P <i>pflA</i> :: <i>lacZ</i> -wt             | D39; $\Delta bgaA$ ::P <i>pflA</i> - <i>lacZ</i> ; Tet <sup>R</sup>                               | This study       |
| P <i>ccpA</i> :: <i>lacZ</i> - $\Delta ccpA$ | $\Delta ccpA$ :Spec <sup>R</sup> ; $\Delta bgaA$ ::P <i>ccpA</i> - <i>lacZ</i> ; Tet <sup>R</sup> | This study       |
| P <i>ccpA</i> :: <i>lacZ</i> - $\Delta glnR$ | $\Delta glnR$ :Spec <sup>R</sup> ; $\Delta bgaA$ ::P <i>ccpA</i> - <i>lacZ</i> ; Tet <sup>R</sup> | This study       |
| P <i>glnR</i> :: <i>lacZ</i> - $\Delta ccpA$ | $\Delta ccpA$ :Spec <sup>R</sup> ; $\Delta bgaA$ ::P <i>glnR</i> - <i>lacZ</i> ; Tet <sup>R</sup> | This study       |
| P <i>glnR</i> :: <i>lacZ</i> - $\Delta glnR$ | $\Delta glnR$ :Spec <sup>R</sup> ; $\Delta bgaA$ ::P <i>glnR</i> - <i>lacZ</i> ; Tet <sup>R</sup> | This study       |
| P <i>pflB</i> :: <i>lacZ</i> - $\Delta ccpA$ | $\Delta ccpA$ :Spec <sup>R</sup> ; $\Delta bgaA$ ::P <i>pflB</i> - <i>lacZ</i> ; Tet <sup>R</sup> | This study       |

| Strains/Plasmids         | Description/Use                                                                              | Source            |
|--------------------------|----------------------------------------------------------------------------------------------|-------------------|
| <i>PpflB::lacZ-ΔgntR</i> | <i>ΔgntR:Spec<sup>R</sup>; ΔbgaA::PpflB-lacZ; Tet<sup>R</sup></i>                            | This study        |
| <i>PpflB::lacZ-ΔglnR</i> | <i>ΔglnR:Spec<sup>R</sup>; ΔbgaA::PpflB-lacZ; Tet<sup>R</sup></i>                            | This study        |
| <i>PpflA::lacZ-ΔccpA</i> | <i>ΔccpA:Spec<sup>R</sup>; ΔbgaA::PpflA-lacZ; Tet<sup>R</sup></i>                            | This study        |
| <i>PpflA::lacZ-ΔglnR</i> | <i>ΔglnR:Spec<sup>R</sup>; ΔbgaA::PpflA-lacZ; Tet<sup>R</sup></i>                            | This study        |
| <i>Escherichia coli</i>  |                                                                                              |                   |
| One Shot® TOP10          | Plasmid propagation                                                                          | Invitrogen, UK    |
| BL21 (DE3) pLysS         | Protein expression                                                                           | Agilent Tech, USA |
| Plasmids                 |                                                                                              |                   |
| pDL278                   | Amplification of <i>Spec<sup>R</sup> (aadA)</i>                                              | 2                 |
| pLEICS-01                | 6His-Tag for protein expression; <i>Amp<sup>R</sup></i>                                      | PROTEX, UK        |
| pCEP                     | Genetic complementation; <i>Kan<sup>R</sup></i>                                              | 3                 |
| pPP1                     | Promoterless <i>lacZ</i> for transcriptional fusions; <i>Amp<sup>R</sup> Tet<sup>R</sup></i> | 4                 |

<sup>a</sup> *Spec<sup>R</sup>*: confers spectinomycin resistance gene (*aadA*), *Kan<sup>R</sup>*: confers kanamycin resistance gene (*aph*), *Amp<sup>R</sup>* and *Tet<sup>R</sup>*: confers ampicillin and tetracycline resistance genes respectively.

**Supplementary Table S3. List of primers used in this study.**

| Primer name    | Sequence (5'–3')         |
|----------------|--------------------------|
| RT-PCR primers |                          |
| gyrB-RT-F      | TGATGACCGATGCCGATG       |
| gyrB-RT-R      | TTGGGCAATATAAACATAACCAGC |
| SPD1797-RT-F   | TATGATGTCGCTCGTGAAGC     |
| SPD1797-RT-R   | GCAACTGCATTTGGACGATA     |
| SPD1745-RT-F   | TTTTATTCCCTCCGCAGACTT    |
| SPD1745-RT-R   | TGTCATCTAATAGGCGAGCAGA   |
| SPD1637-RT-F   | GGTCTTGTGCCACCGATTAC     |
| SPD1637-RT-R   | TCGTTTCATCTCCCTTTTGG     |
| SPD1594-RT-F   | TTGAAGAGAGGGTTGGCAAG     |
| SPD1594-RT-R   | TTTTGCGCAATTTGACGATA     |
| SPD1524-RT-F   | AACAACCTCCAACCGTGAGG     |
| SPD1524-RT-R   | GGGCGATTAGCTCCTTATCC     |
| SPD0447-RT-F   | CATGGATCGTCTGCTTGAAA     |
| SPD0447-RT-R   | CCCTGTTGGAGGAGTTCATT     |
| SPD0379-RT-F   | TCATCGGTAAGGCTCCAGAT     |
| SPD0379-RT-R   | GTCAAATGCAGATGCACCAC     |
| SPD0420-RT-F   | TCCCTGCTGGATTTATCGAC     |
| SPD0420-RT-R   | TGGGTCTGGTTCGTATCCAT     |
| SPD1774-RT-F   | GGAAAACCTGTCTGGATTTCG    |
| SPD1774-RT-R   | TTCACGCCACTTGAACCTCAC    |
| SPD1078-RT-F   | ACGCGTTATCGGTTCAGGTA     |
| SPD1078-RT-R   | GTGACCAAACAGCGAACTCA     |
| SPD1050-RT-F   | GGTTCTGAGTGTGTGGCTGA     |
| SPD1050-RT-R   | AAAGCGTGGGTCTGAAAAGA     |
| SPD1634-RT-F   | GGGCTGATCAACGTGCTATT     |
| SPD1634-RT-R   | CTCAGCACGACGTTTCATTGT    |
| SPD1834-RT-F   | TGCCAAAGCATCAGTAGCAG     |
| SPD1834-RT-R   | GTGTGGCGCATGTTGTTTAC     |

**Supplementary Table S3 continued**

| Primer name        | Sequence (5'-3')                             |
|--------------------|----------------------------------------------|
| SPD1853-RT-F       | GGATTTCGTGGTTTGGTTGT                         |
| SPD1853-RT-R       | TTTCAAGCGTTCAACGTCAC                         |
| SPD0559-RT-F       | GCTGAGAAAGTGGTGGTTGTT                        |
| SPD0559-RT-R       | AGTCCATCAACTGAGCCAGAA                        |
| SOEing PCR primers |                                              |
| Spec-F             | ATCGATTTTCGTTCGTGAATACATGTTAT                |
| Spec-R             | GTTATGCAAGGGTTTATTGTTTTCTA                   |
| LF-SOE1797-F       | GAATCGCCCGGGGCTTATCCAAC                      |
| LF-SOE1797-R       | TATTCACGAACGAAAATCGATTACTGTATCATCTGCATTCATTC |
| RF-SOE1797-F       | AACAATAAACCTTGCATAACTCAACACGAAAACGTAAATAGAA  |
| RF-SOE1797-R       | TATGACAGATGAGCTGATTGATA                      |
| LF-SOE1745-F       | GCGTCCAACGTGGCTCTGCACCA                      |
| LF-SOE1745-R       | TATTCACGAACGAAAATCGATTTTCTCTGCGAGTGTATTCATTA |
| RF-SOE1745-F       | AACAATAAACCTTGCATAACAAGGAACTAGATACTGTTTAGTT  |
| RF-SOE1745-R       | GCTAGGACACTATGGACTTCTTG                      |
| LF-SOE1637-F       | CCACGTTTTTGGTCTACACTCAA                      |
| LF-SOE1637-R       | TATTCACGAACGAAAATCGATACTGGCAGATTTAATATTCACAC |
| RF-SOE1637-F       | AACAATAAACCTTGCATAACTATAAGGAAGGAAAATTTTAAAT  |
| RF-SOE1637-R       | TGCTCCACGCATCTTAGCCGCGA                      |
| LF-SOE1594-F       | ATCAGCAGATTTGTTTGAGTATA                      |
| LF-SOE1594-R       | TATTCACGAACGAAAATCGATCAATACCCGACCATTAAACATTT |
| RF-SOE1594-F       | AACAATAAACCTTGCATAACTACAAAAGAAATAATTTATAATT  |
| RF-SOE1594-R       | CCCTTAGATTTGATTCCGATTCT                      |
| LF-SOE1524-F       | ATTTGTTGGAGCAAGCTCTCTAA                      |
| LF-SOE1524-R       | TATTCACGAACGAAAATCGATGTTGTCAAATGTCCAGGACATCT |
| RF-SOE1524-F       | AACAATAAACCTTGCATAACGATTATATTAAGGAGTTTAAGC   |
| RF-SOE1524-R       | ATTGGCTCGATATCAGAAATCAA                      |
| LF-SOE0447-F       | TCGATAAATCCCAGTTCAAACCT                      |

**Supplementary Table S3 continued**

| Primer name             | Sequence (5'-3')                              |
|-------------------------|-----------------------------------------------|
| LF-SOE0447-R            | TATTCACGAACGAAAATCGATGCGAAATTCTTTTCCTTCATTT   |
| RF-SOE0447-F            | AACAATAAACCTTGCATAACTCACCTTTTGGTCGCGGTTAGGC   |
| RF-SOE1524-R            | ATTGGCTCGATATCAGAAATCAA                       |
| LF-SOE0447-F            | TCGATAAATCCCAGTTCAAACCTT                      |
| LF-SOE0447-R            | TATTCACGAACGAAAATCGATGCGAAATTCTTTTCCTTCATTT   |
| RF-SOE0447-F            | AACAATAAACCTTGCATAACTCACCTTTTGGTCGCGGTTAGGC   |
| RF-SOE0447-R            | TCCCATTTTGGTCAAGACATTCA                       |
| LF-SOE0379-F            | GTTTTAATGGAAGTTGACGGTGC                       |
| LF-SOE0379-R            | TATTCACGAACGAAAATCGATATTGATTTCGTTGGTAGTCCATTT |
| RF-SOE0379-F            | AACAATAAACCTTGCATAACTTTTGGAGGATTTGAAATAATG    |
| RF-SOE0379-R            | AATGCCCATAAGTTAAACACTCG                       |
| Kan-F                   | GAGGTGCTACCATGGCGCGCA                         |
| Kan-R                   | CTAAAACAATTCATCCAGTAA                         |
| LF-SOE1797K-F           | GAATCGCCCGGGGCTTATCCAAC                       |
| LF-SOE1797K-R           | TGCGCGCCATGGTAGCACCTCTACTGTATCATCTGCATTCATTC  |
| RF-SOE1797K-F           | TTACTGGATGAATTGTTTTAGTCAACACGAAAACGTAAATAGAA  |
| RF-SOE1797K-R           | TATGACAGATGAGCTGATTGATA                       |
| Complementation primers |                                               |
| SPD1797-Comp-F          | CGGCATGCGAATAAGTAGAAATATGAAA                  |
| SPD1797-Comp-R          | CGGGATCCCTATTTACGTTTTTCGTGTTG                 |
| SPD1745-Comp-F          | CGCCATGGGTAATTTTAACTTTTTTTTT                  |
| SPD1745-Comp-R          | CGGGATCCCTAACAGTATCTAGTTCCT                   |
| SPD1524-Comp-F          | CGCCATGGTTCTTTTCATTATAACCATTT                 |
| SPD1524-Comp-R          | CGGGATCCTTAAACTCCTTTAATATAAT                  |
| SPD0447-Comp-F          | CGCCATGGATATTGATCGTATTCGTCTC                  |
| SPD0447-Comp-R          | CGGGATCCCTAACCGCGACCAAAGGTG                   |
| Comp-Seq-F              | GCTTGAAAAGGAGTATACTTAT                        |
| Comp-Seq-R              | AGGAGACATTCCTTCCGTATC                         |

**Supplementary Table S3 continued**

| Primer name                     | Sequence (5'-3')                       |
|---------------------------------|----------------------------------------|
| Cloning into pLEICES-01 primers |                                        |
| SPD1797-C-F                     | TACTTCCAATCCATGAATGCAGATGATACAGTAA     |
| SPD1797-C-R                     | TATCCACCTTTACTGTCATTTACGTTTTTCGTGTTGA  |
| SPD1745-C-F                     | TACTTCCAATCCATGAATACACTCGCAGAGAAATT    |
| SPD1745-C-R                     | TATCCACCTTTACTGTCAAACAGTATCTAGTTCCTT   |
| SPD1637-C-F                     | TACTTCCAATCCATGAATATTAATCTGCCAGTGA     |
| SPD1637-C-R                     | TATCCACCTTTACTGTCAAATTTTCCTTCCTTATA    |
| SPD1594-C-F                     | TACTTCCAATCCATGTTTAATGGTCGGGTATTGAA    |
| SPD1594-C-R                     | TATCCACCTTTACTGTCATAAATTATTTCTTTTGTACA |
| SPD1524-C-F                     | TACTTCCAATCCATGTCCTGGACATTTGACAACAA    |
| SPD1524-C-R                     | TATCCACCTTTACTGTCAAACCTCCTTTAATATAATCA |
| SPD0447-C-F                     | TACTTCCAATCCATGAAGGAAAAAGAATTTGCGCCGA  |
| SPD0447-C-R                     | TATCCACCTTTACTGTCAACCGCGACCAAAAAGGTGA  |
| SPD0379-C-F                     | TACTTCCAATCCATGGACTACCAACGAATCAATGA    |
| SPD0379-C-R                     | TATCCACCTTTACTGTCATTTCAAATCCTCCAAAAATT |
| EMSA primers                    |                                        |
| <i>PccpA</i> -EMSA-F            | TGAAATTTTTTCAATCAATCTTCA               |
| <i>PccpA</i> -EMSA-R            | GTGAAAATTTTCGTTTTTCATATTT              |
| <i>PplcR</i> -EMSA-F            | CCACGTTTTTTTTCTCATGCA                  |
| <i>PplcR</i> -EMSA-R            | AAAATTACATAAAAATACTT                   |
| <i>gyrB</i> -EMSA-F             | ATGACAGAAGAAATCAAAAATCTGC              |
| <i>gyrB</i> -EMSA-R             | CCTGGACGCATACGAACAG                    |
| <i>PmerR</i> -EMSA-F            | AAATTTTTTCGATTAGATACA                  |
| <i>PmerR</i> -EMSA-R            | CATTCACTGAATTCACGCTA                   |
| <i>PgntR</i> -EMSA-F            | CCCAAACAATTCTTCTTTTT                   |
| <i>PgntR</i> -EMSA-R            | GGACATCTTGGTCTCCT                      |
| <i>PglnR</i> -EMSA-F            | CATTATCAATTGACGTTTGT                   |
| <i>PglnR</i> -EMSA-R            | CCATATTTTCGGCGAAATTCT                  |



**Supplementary Table S3 continued**

| Primer name                          | Sequence (5'–3')               |
|--------------------------------------|--------------------------------|
| <i>PmarR</i> -EMSA-F                 | AAAATCCTTGCATCATTCTT           |
| <i>PmarR</i> -EMSA-R                 | ATTTTTCATATCCCTCCTTCT          |
| <i>PpflB</i> -EMSA-F                 | CAGTTTGAAATAAAAATATAG          |
| <i>PpflB</i> -EMSA-R                 | GACAAGTATACCATAAAGTA           |
| <i>PpflB</i> ( <i>cre1</i> -)-EMSA-F | AAAAGGACTTTATTTTTTTC           |
| <i>PpflB</i> ( <i>cre1</i> -)-EMSA-R | AAGTGCAAAATCCCTATTTT           |
| <i>PpflA</i> -EMSA-F                 | GAAAAACAGATTGCTTTCTA           |
| <i>PpflA</i> -EMSA-R                 | GTTACCTTCCTTGAAAACGT           |
| <i>PpflA</i> ( <i>cre1</i> -)-EMSA-F | TAATCTGATGATAGATTGAA           |
| <i>PpflA</i> ( <i>cre1</i> -)-EMSA-R | TTATTATATCACGACTTGAA           |
| Transcriptional lacZ fusion primers  |                                |
| <i>PccpA</i> -Fusion-F               | CGGCATGCCCTAGGTTTTCTATGAAATT   |
| <i>PccpA</i> -Fusion-R               | CGGGATCCAAATGGTTACTGTATCATCT   |
| <i>PplcR</i> -Fusion-F               | CGGCATGCCTTTCTTTTTCTTGTTTTT    |
| <i>PplcR</i> -Fusion-R               | CGGGATCCATCTGAATTTCTCTGCGAGT   |
| <i>PmerR</i> -Fusion-F               | CGGCATGCGTTAATGATAAAAAATTTTTTC |
| <i>PmerR</i> -Fusion-R               | CGGGATCCACAAATCACTGGCAGATTTA   |
| <i>PgntR</i> -Fusion-F               | CGGCATGCCGCATCCTTTCCCTCCTTAT   |
| <i>PgntR</i> -Fusion-R               | CGGGATCCGTTTTTTTGTTGTCAAATGTC  |
| <i>PglnR</i> -Fusion-F               | CGGCATGCCGTATTCGTCTCTTTTTAGA   |
| <i>PglnR</i> -Fusion-R               | CGGGATCCTATTTTCGGCGAAATTCTTTT  |
| <i>PmarR</i> -Fusion-F               | CGGCATGCGGAGTGCGAGCTCATTCGGA   |
| <i>PmarR</i> -Fusion-R               | CGGGATCCAATATTCATTGATTCGTTGG   |
| <i>PpflA</i> -Fusion-F               | CGGCATGCTCTGATGATAGATTGAAAAT   |
| <i>PpflA</i> -Fusion-R               | CGGGATCCGTCCATAATCAATTGTTTCT   |
| <i>PpflB</i> -Fusion-F               | CGGCATGCGAAAAAAGGACTTTATTTTT   |
| <i>PpflB</i> -Fusion-R               | CGGGATCCGTGCTTCAACAACGTCTTA    |
| Fusion-Seq-F                         | CTACTTGGAGCCACTATCGA           |
| Fusion-Seq-R                         | AGGCGATTAAGTTGGGTAAC           |

**Supplementary Figure S1:** SDS-PAGE (A) and Western blot (B) analysis of recombinant regulatory proteins. CcpA (38.8 kDa), PlcR (35.8 kDa), NmlR (15.2 kDa), GntR (15.7 kDa), GlnR (15.6 kDa) and MarR (18.4 kDa). SDS gel stained with Coomassie Brilliant Blue. Western hybridisation was done using Anti-His Tag monoclonal antibody (Sigma-Aldrich, UK). The blotted nitrocellulose membrane (Roche Applied Science, USA) was incubated for 2 h with the primary antibody. The membrane was washed with PBS-Tween20 (PBS 1000 ml, Tween 500  $\mu$ l), and then incubated with the secondary antibody. The membrane was visualized with 5-Bromo-4-Chloro-Indolyl-Phosphatase (BCIP) (Sigma-Aldrich, UK).

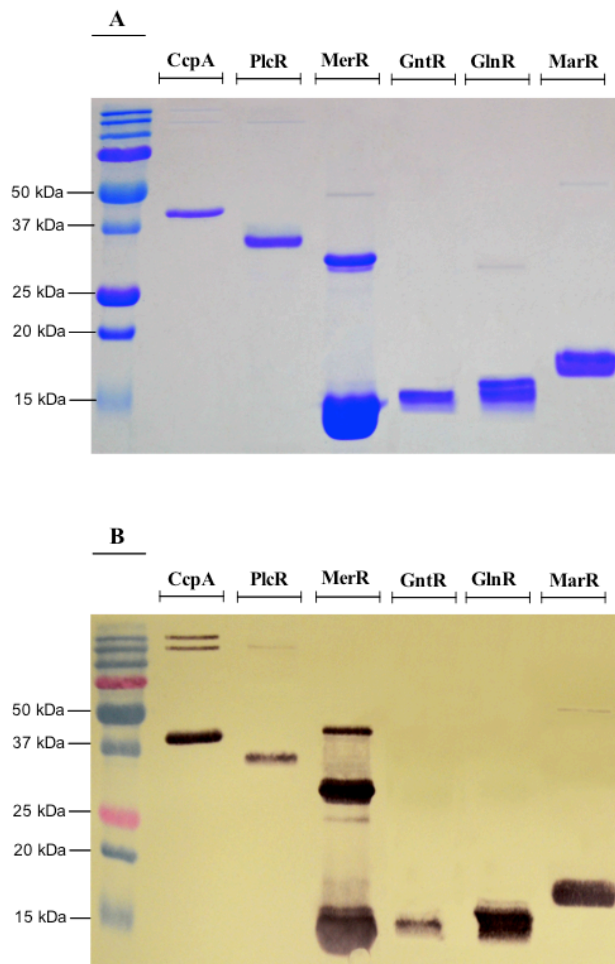

**Supplementary Figure S2: EMSA analysis showing the direct interaction of GntR with *PpfIB*.** Each lane contains approximately 30 ng *PpfIB*. GntR was used between 0.1 to 0.5  $\mu$ M. The coding sequence of *gyrB* (30 ng) was used as a negative control. Gels were stained with SYBR Green EMSA for visualizing DNA.

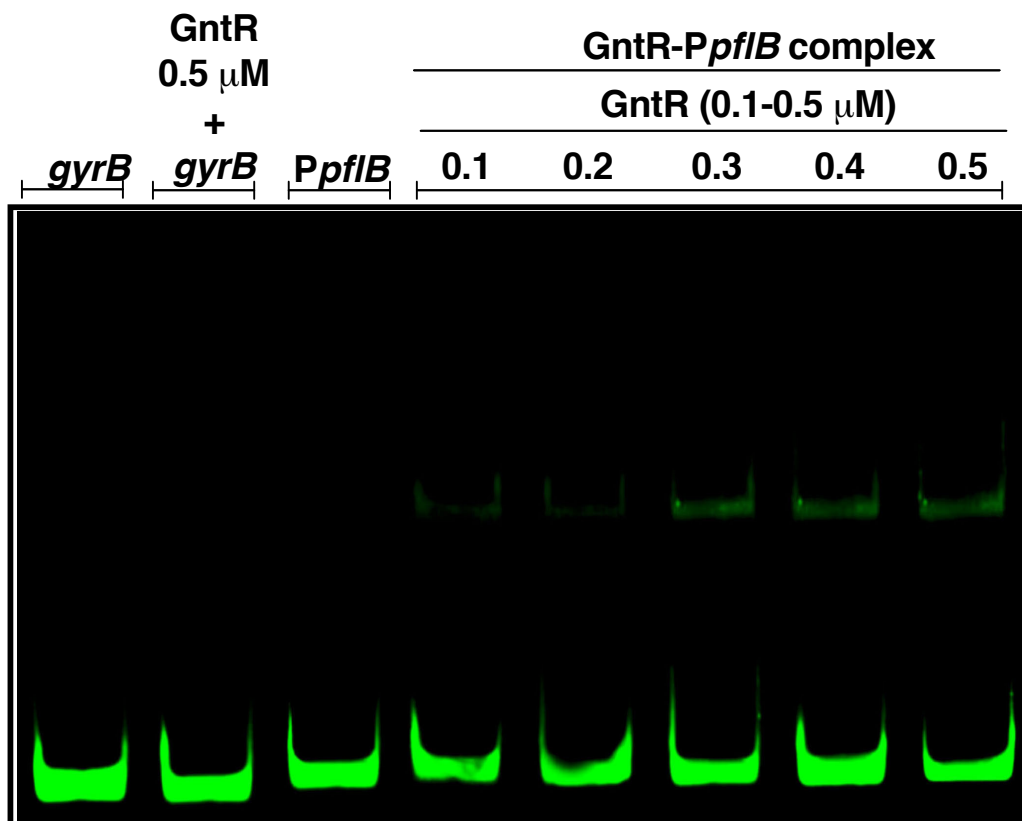

**Supplementary Figure S3: The impact of sodium formate on binding affinity of CcpA (a) and GlnR (b) for *Ppf1B*.** The presence of 10 mM sodium formate increased CcpA and decreased GlnR binding affinity for *Ppf1B*. This experiment was reproduced 3 times.

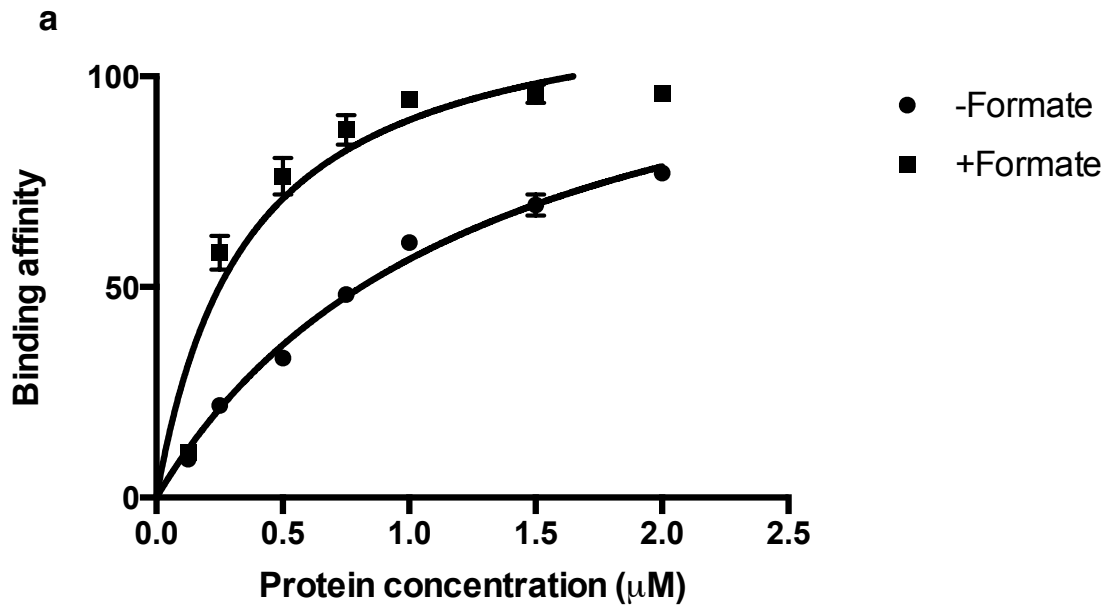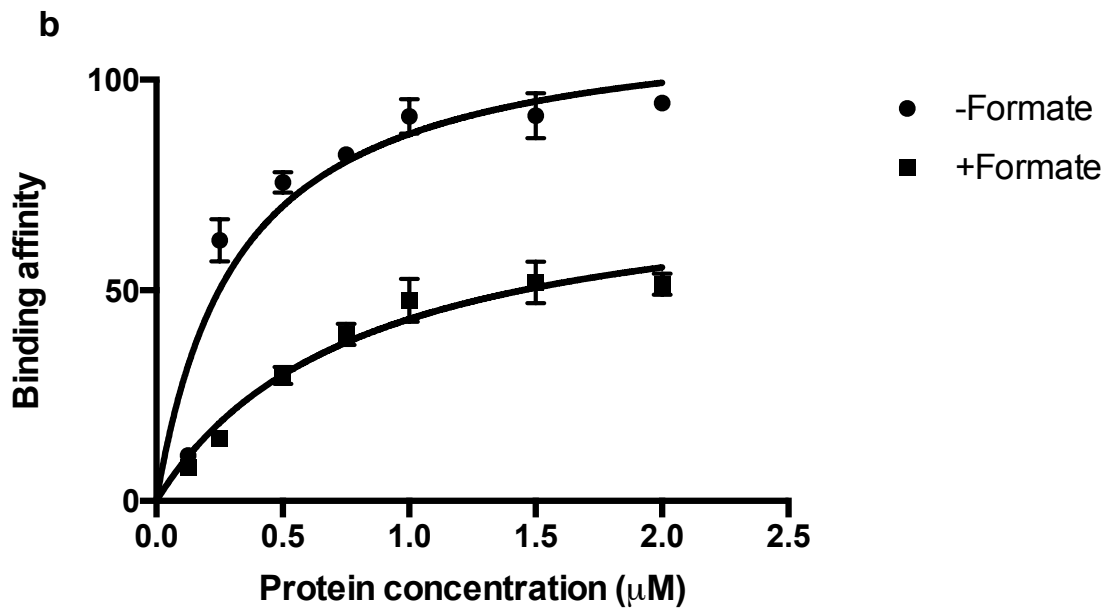

**Supplementary Figure S4:** Schematic representation showing the analysis of predicted promoter region and binding sites of *PpfIB* (A) and *PpfIA* (B) used in EMSA. The core promoter region containing the -10 and -35 elements is indicated. The putative *cre* sequences are indicated in red. The *cre1* sequence, was excluded from *PpfIB(cre1<sup>-</sup>)* and *PpfIA(cre1<sup>-</sup>)*. F: indicates forward primer while R: refers to the reverse primer used for amplifying the promoter probe. T: potential terminator structure. The black arrow presents the direction of transcription.

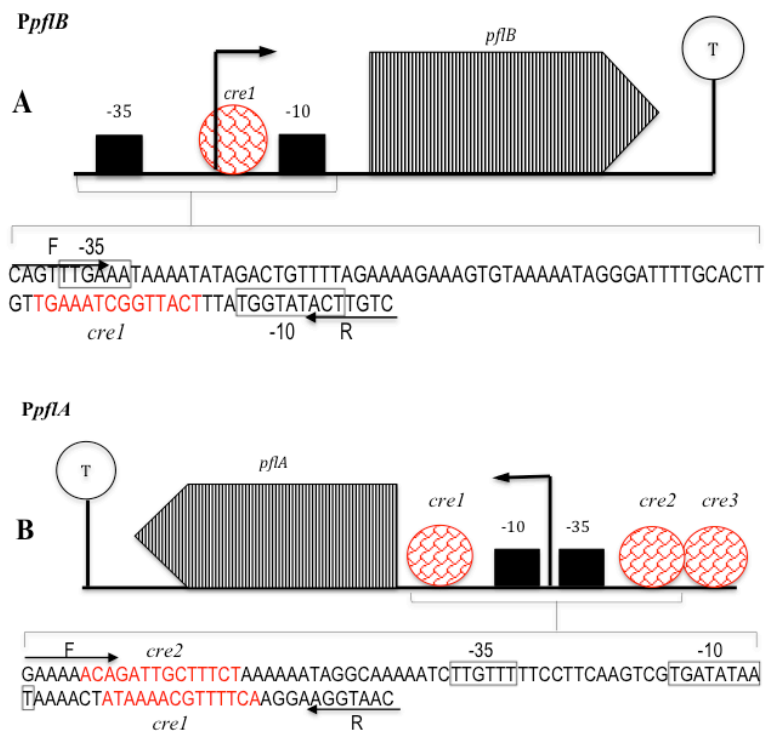

## SUPPLEMENTARY REFERENCES

1. Yesilkaya, H. *et al.* Pyruvate formate lyase is required for pneumococcal fermentative metabolism and virulence. *Infect. Immun.* **77**, 5418–5427 (2009).
2. Yesilkaya, H. *Studies on the role of superoxide dismutase (SOD) in the virulence of Streptococcus pneumoniae and the effects of interferon gamma on sensitivity of phagocytes to the toxin pneumolysin.* PhD Thesis. Department of Infection, Immunity and Inflammation, (University of Leicester, 1999).
3. Guiral, S. *et al.* Construction and evaluation of a chromosomal expression platform (CEP) for ectopic, maltose-driven gene expression in *Streptococcus pneumoniae*. *Microbiology* **152**, 343–9 (2006).
4. Halfmann, A., Hakenbeck, R. & Brückner, R. A new integrative reporter plasmid for *Streptococcus pneumoniae*. *FEMS Microbiol. Lett.* **268**, 217–24 (2007).
